# Supplementary material for: Recycling of Lycium barbarum by-products and bioactive substance application in silage - Insight into antioxidant activity and the regulation mechanism of anaerobic fermentation
Source: Research Square preprint supplement (doi:10.21203/rs.3.rs-5960294/v1), 2025-04-22
Supplement: Supplementary file 1 [file 2959c21333e0676edad1a266.docx]

**Supplementary Materials**


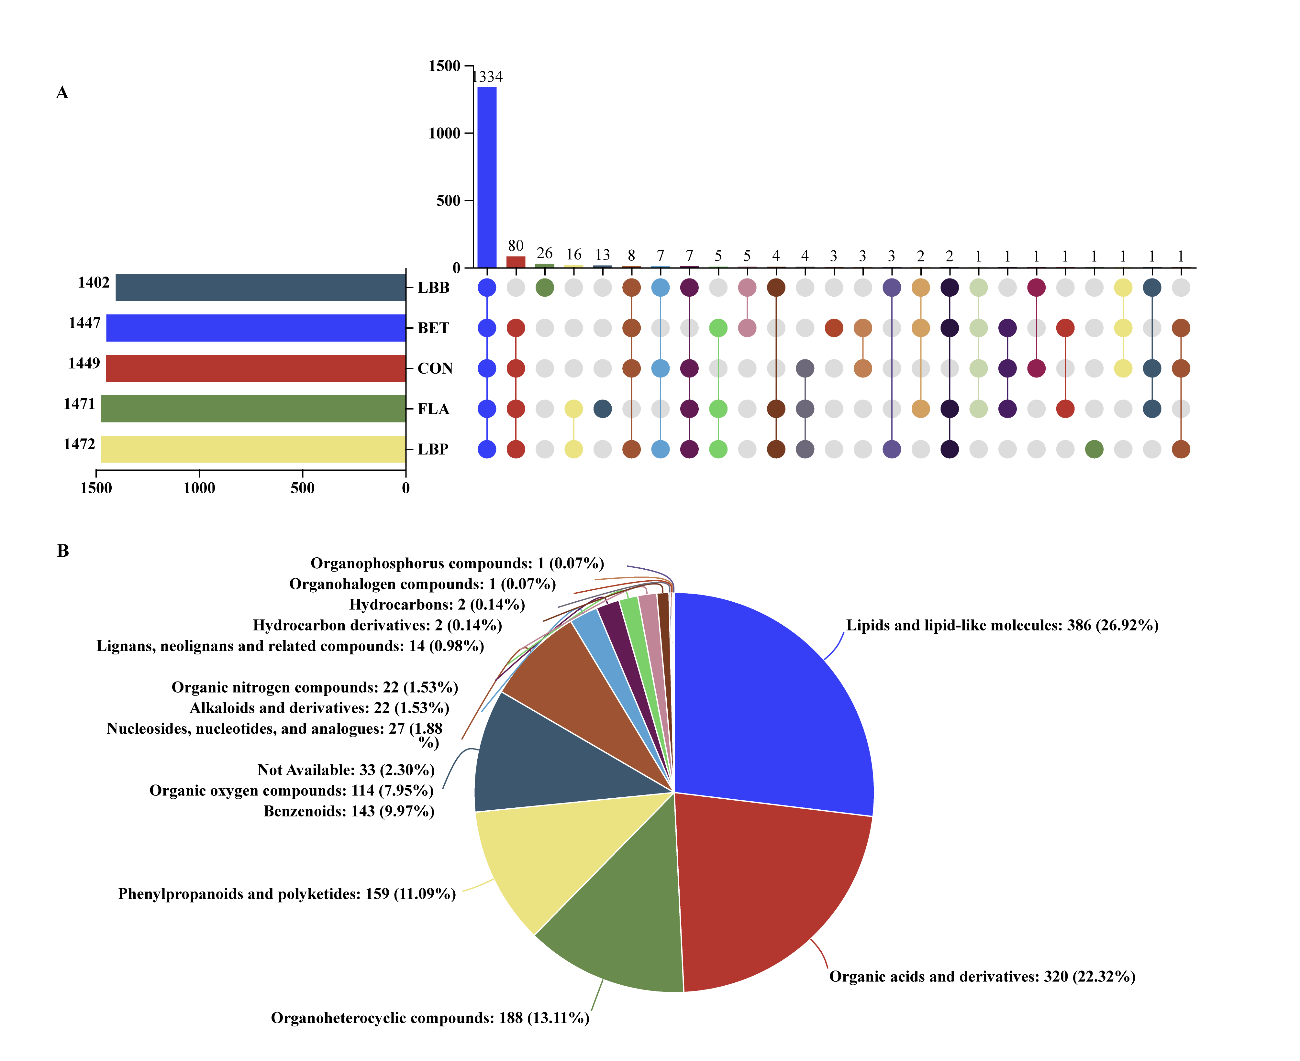


**Fig. S1**. Metabolome analysis of silage. (A) UpSet diagram of the metabolite compositions in different groups. (B) The HMDB compound classification of identified metabolites.


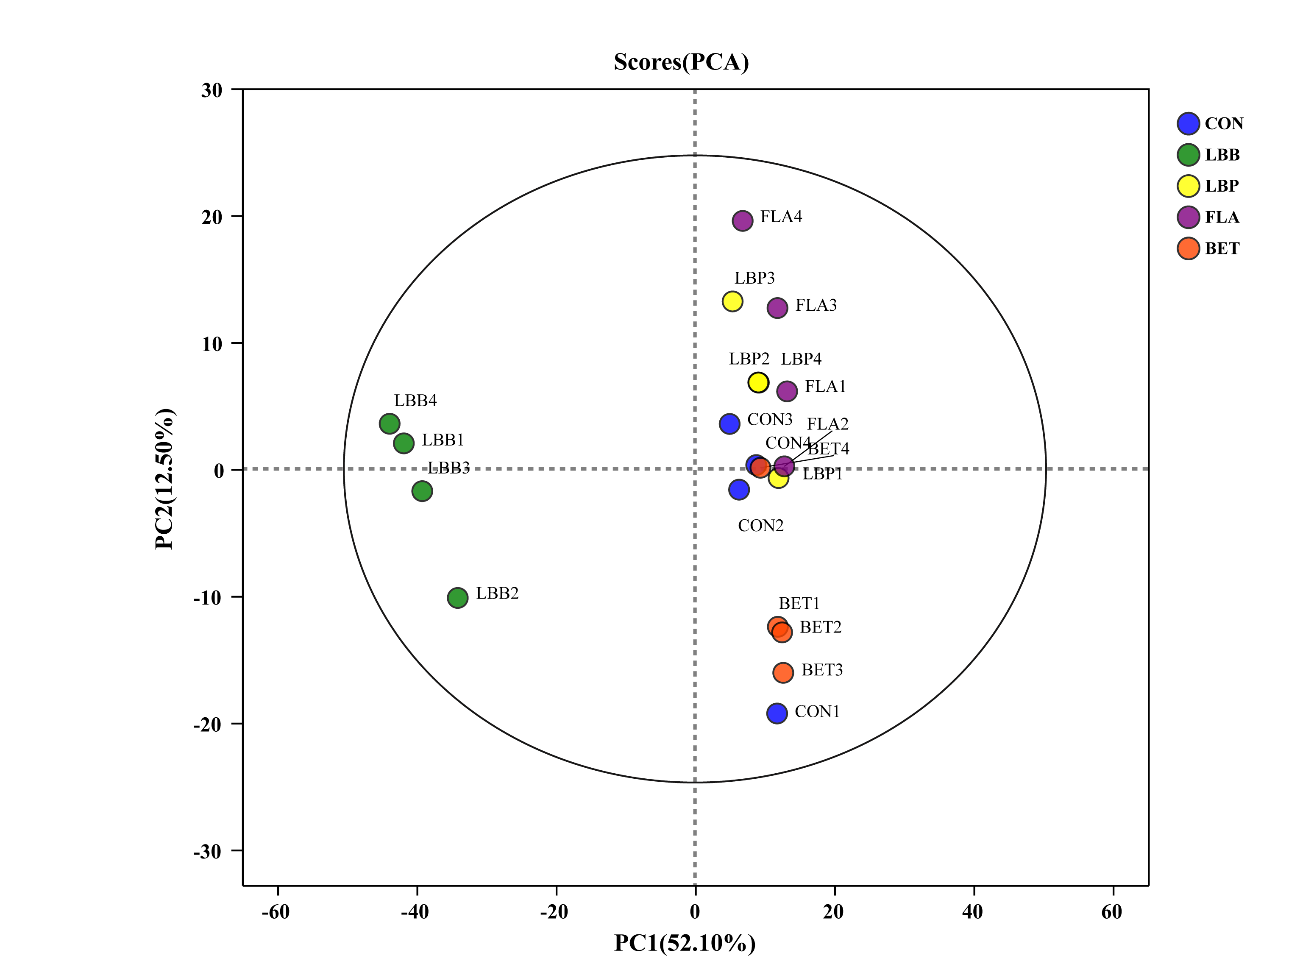


**Fig. S2.** Score scatter plot of principal component analysis (PCA), The regions within 95% confidence intervals were formed in the PCA plots.


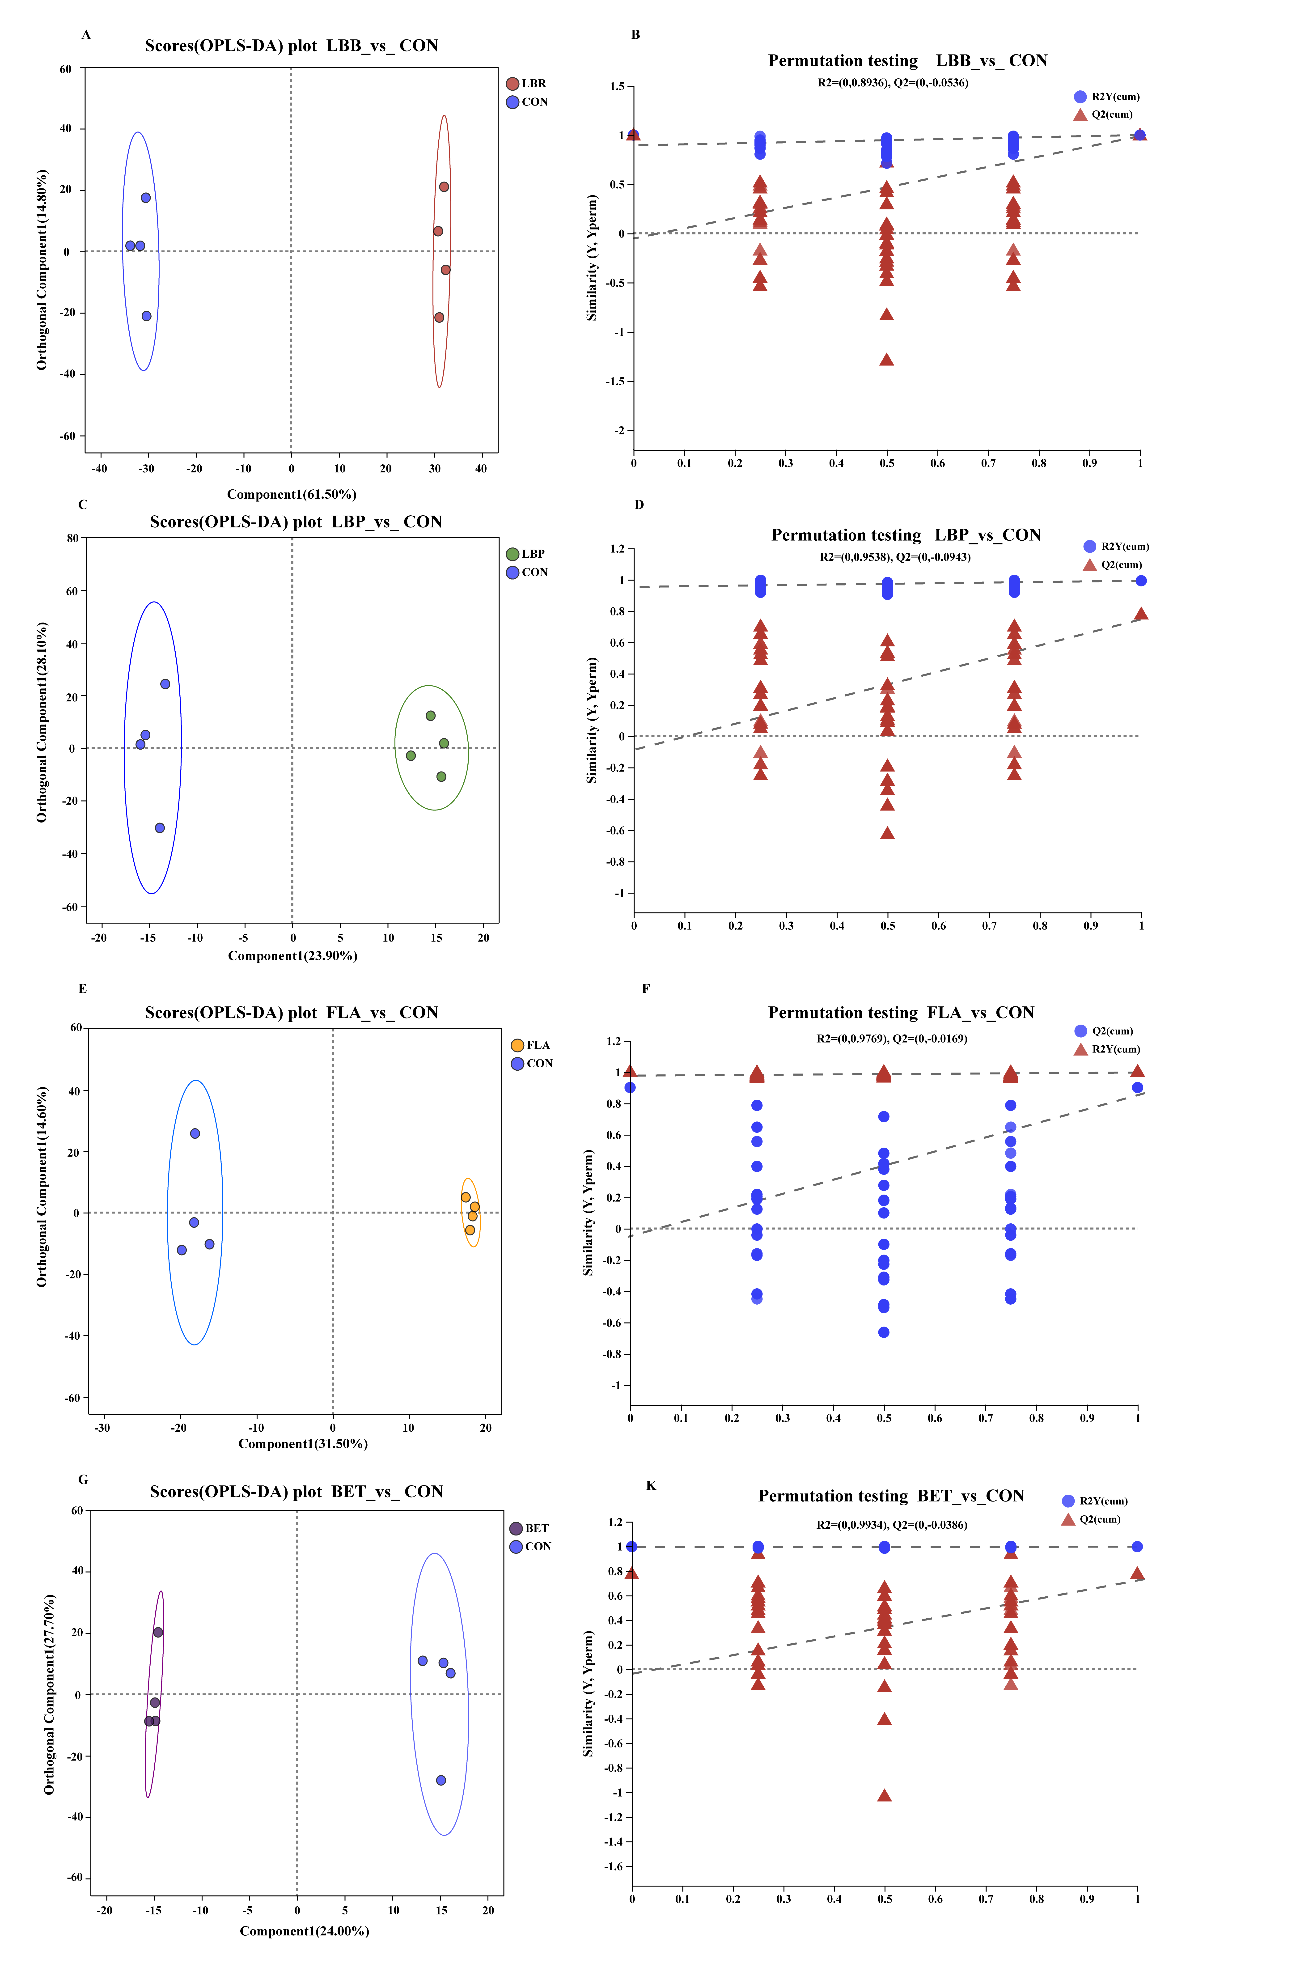


**Fig. S3.** OPLS-DA score plots and corresponding validation plots derived from the LC-MS metabolite profiles of silage samples. of all samples. R2 and Q2 represent the interpretability and predictability of models, respectively.

**Table S1** The HMDB compound classification of 1434 identified metabolites.

| Superclass | Number |
| --- | --- |
| Lipids and lipid-like molecules | 386 |
| Organic acids and derivatives | 320 |
| Organoheterocyclic compounds | 188 |
| Phenylpropanoids and polyketides | 159 |
| Benzenoids | 143 |
| Organic oxygen compounds | 114 |
| Not Available | 33 |
| Nucleosides, nucleotides, and analogues | 27 |
| Alkaloids and derivatives | 22 |
| Organic nitrogen compounds | 22 |
| Lignans, neolignans and related compounds | 14 |
| Hydrocarbon derivatives | 2 |
| Hydrocarbons | 2 |
| Organohalogen compounds | 1 |
| Organophosphorus compounds | 1 |

**Table S2** The 9 metabolites were common in different comparison pairs.

| Metabolites | CON | LBB | LBP | FLA | BET | Significance |
| --- | --- | --- | --- | --- | --- | --- |
| Bisnoryangonin | 5.55 | 6.07 | 5.39 | 5.37 | 5.42 | < 0.01 |
| 8,9-Epoxyeicosatrienoic acid | 6.15 | 5.71 | 5.66 | 5.59 | 5.85 | < 0.01 |
| Ethylbenzene | 5.89 | 6.27 | 6.16 | 6.12 | 6.14 | < 0.01 |
| Aldosterone | 4.81 | 5.68 | 5.44 | 5.53 | 5.61 | 0.01 |
| Nigerloxin | 6.68 | 7.16 | 6.55 | 6.51 | 6.57 | 0.01 |
| 13'-Hydroxy-gamma-tocotrienol | 5.17 | 5.95 | 4.45 | 4.12 | 3.92 | 0.01 |
| Clavulanate | 4.47 | 4.94 | 4.77 | 4.67 | 4.71 | < 0.01 |
| L-Asparagine | 4.28 | 5.13 | 4.86 | 4.63 | 4.47 | < 0.01 |
| Suberylglycine | 6.50 | 6.99 | 6.35 | 6.35 | 6.40 | < 0.01 |
